# Supplementary material for: Flame Retardancy and Mechanical Properties of Melt-Spun PA66 Fibers Prepared by End-Group Blocking Technology
Source: MDPI journal article supplement (doi:10.3390/polym15051183), 2023-02-26
Supplement: s1 [file s1]

# Flame Retardancy and Mechanical Properties of Melt-Spun PA66 Fibers Prepared by End-Group Blocking Technology

Yanpeng Wu <sup>1</sup>, Tonghui Yang <sup>1</sup>, Yongchang Cheng <sup>1</sup>, Tao Huang <sup>1,\*</sup>, Bin Yu <sup>1,\*</sup>, Qilin Wu <sup>1,\*</sup>, Meifang Zhu <sup>1</sup> and Hao Yu <sup>1</sup>

*State Key Laboratory for Modification of Chemical Fibers and Polymer Materials, College of Materials Science and Engineering, Donghua University, Shanghai 201620, P. R. China*

\* Correspondence: ht@dhu.edu.cn (T. Huang), yubin@dhu.edu.cn (B. Yu), wql@dhu.edu.cn (Q. L. Wu)

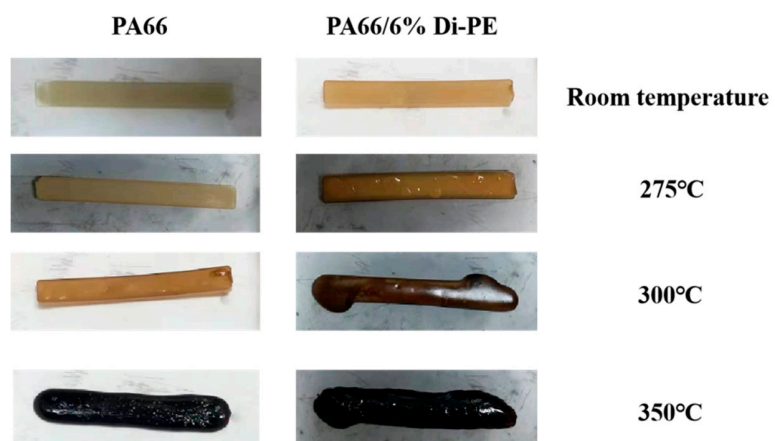

**Figure S1** Pure PA66 and PA66/6% Di-PE composites in muffle furnace at different temperature

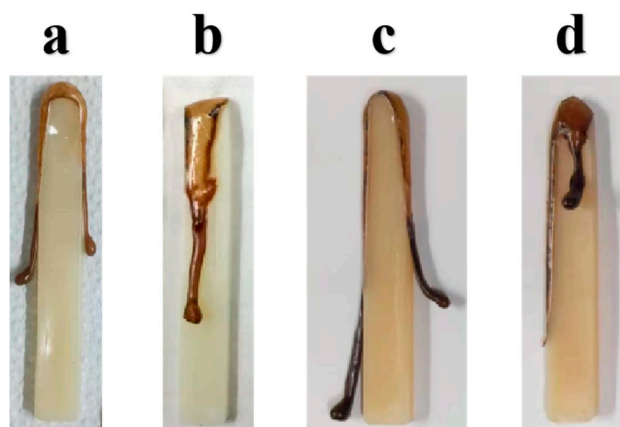

**Figure S2** Digital photos of Pure PA66 (a)、PA66/2% Di-PE (b)、PA66/4% Di-PE (c) and PA66/6% Di-PE (d) after LOI test.

Table S1 Representative information of PA66 flame retardant modified from recent years.

| Materials                       | Method            | Content | LOI (%) | UL-94 | Cone calorimeter power (kW/m <sup>2</sup> ) | PHRR (kW/m <sup>2</sup> ) | THR (MJ /m <sup>2</sup> ) | Reference |
|---------------------------------|-------------------|---------|---------|-------|---------------------------------------------|---------------------------|---------------------------|-----------|
| PA66-10% MCPO                   | Copolym erization | 10      | 29.0    | V-0   | 50                                          | 429.0                     | 60.2                      | [1]       |
| PA66-6% CEPPA                   | Copolym erization | 6       | 28.0    | V-0   | -                                           | -                         | -                         | [2]       |
| PA66-5% DDP-HMDA                | Copolym erization | 5       | 33.2    | V-0   | 50                                          | 712.0                     | 105.9                     | [3]       |
| PA66-5% NENP                    | Copolym erization | 5       | 28.0    | V-0   | 50                                          | 432.6                     | 72.9                      | [4]       |
| PA66-4.5% PDPPD                 | Copolym erization | 4.5     | 29.0    | V-0   | 50                                          | 570.0                     | 80.0                      | [5]       |
| 83PA66/12% ADCP/5% Nano-Silica  | Blending          | 17      | 35.2    | V-0   | 35                                          | 462.2                     | 40.7                      | [6]       |
| 84.5PA66/6% MCA/6% ALPi/2.5% Gr | Blending          | 14.5    | -       | V-0   |                                             | -                         | -                         | [7]       |
| 90PA66/9.7% ALPi/0.3% MgO       | Blending          | 10      | 32.8    | V-0   | 50                                          | 698.0                     | 98.0                      | [8]       |
| 90PA66/10% ADCP                 | Blending          | 10      | 28.0    | V-0   | -                                           | -                         | -                         | [9]       |
| 90PA66/10DT                     | Blending          | 10      | 27.6    | -     | 50                                          | 481.0                     | 48.6                      | [10]      |
| PA66/6% Di-PE                   | Blending          | 6       | 29.4    | V-0   | 50                                          | 558.7                     | 60.1                      | This work |

## References

1. Lyu, W.; Chen, X.; Li, Y.; Cao, S.; Han, Y., Thermal stability and heat release effect of flame retarded PA66 prepared by end-pieces capping technology. *Composites Part B: Engineering* **2019**, *167*, 34-43.
2. Chen, X.; Xu, D.; Zhang, H.; Feng, X.; Deng, J.; Pan, K., In situ polymerization of flame retardant modification polyamide 6,6 with 2-carboxy ethyl (phenyl) phosphinic acid. *Journal of Applied Polymer Science* **2020**, *137* (20), 48687.
3. Li, Y.; Liu, K.; Zhang, J.; Xiao, R., Preparation and characterizations of inherent flame retarded polyamide 66 containing the phosphorus linking pendent group. *Polymers for Advanced Technologies* **2018**, *29* (2), 951-960.
4. Lyu, W.; Cui, Y.; Zhang, X.; Yuan, J.; Zhang, W., Thermal stability, flame retardance, and mechanical properties of polyamide 66 modified by a nitrogen-phosphorous reacting flame retardant. *Journal of Applied Polymer Science* **2016**, *133* (24), 43538.
5. Lyu, W.; Cui, Y.; Zhang, X.; Yuan, J.; Zhang, W., Fire and thermal properties of PA 66 resin treated with poly-N-aniline-phenyl phosphamide as a flame retardant. *Fire and Materials* **2017**, *41* (4), 349-361.
6. Zhang, H.; Lu, J.; Yang, H.; Yang, H.; Lang, J.; Zhang, Q., Synergistic flame-retardant mechanism of dicyclohexenyl aluminum hypophosphite and nano-silica. *Polymers* **2019**, *11* (7), 1211.
7. Luo, D.; Liu, Y.; Shi, Y.; Wang, Q., The properties of flame retardant and heat conduction polyamide 66 based on melamine cyanurate/aluminum diethylphosphinate/graphene. *Journal of Polymer Research* **2019**, *26* (9), 216.
8. Zhan, Z.; Shi, J.; Zhang, Y.; Zhang, Y.; Zhang, B.; Liu, W., The study on flame retardancy synergetic mechanism of magnesium oxide for PA66/AlPi composite. *Materials Research Express* **2019**, *6* (11), 115317.
9. Zhang, H.; Lu, J.; Yang, H.; Lang, J.; Yang, H., Comparative study on the flame-retardant properties and mechanical properties of PA66 with different dicyclohexyl hypophosphite acid metal salts. *Polymers* **2019**, *11* (12), 1956.
10. Guo, S.; Bao, M.; Ni, X., The synthesis of meltable and highly thermostable triazine-DOPO flame retardant and its application in PA66. *Polymers for Advanced Technologies* **2021**, *32* (2), 815-828.
